# Supplementary material
Source: publisher figshare collection journal article supplement (https://wiley.figshare.com/articles/dataset/_/3519575)
Supplement: Supplementary file 1 [file 1 › appendix-A.htm]

Ecological Archives A024-068-A1


*Ecological Archives* A024-068-A1

Katherine M. Marchetto, Katriona Shea, Dave Kelly, Ronny Groenteman, Zeynep Sezen, Eelke Jongejans. 2014. Unrecognized impact of a biocontrol agent on the spread rate of an invasive thistle. *Ecological Applications* 24:1178–1187. http://dx.doi.org/10.1890/13-1309.1

Appendix A. Detailed description of population spread rate model.

> View / download PDF.


---

[Back to A024-068]
